# Supplementary material
Source: Springer Nature journal article supplement (https://www.springermedizin.de/resource/supplementary/12889_2013_5860_MOESM3_ESM.pdf/9496374)

**Men, 35-44**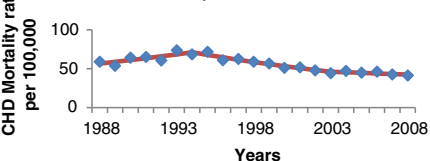**Women, 35-44**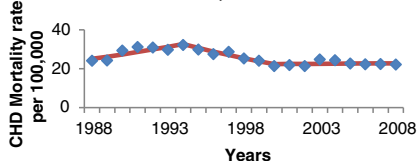**Men, 45-54**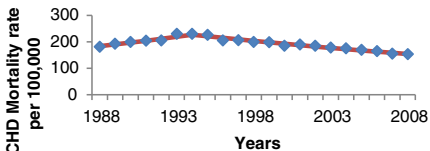**Women, 45-54**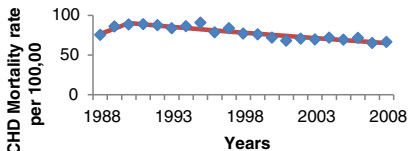**Men, 55-64**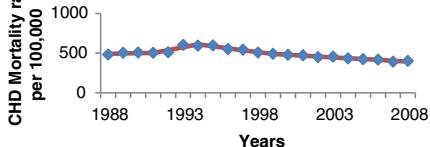**Women, 55-64**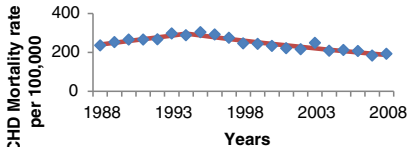**Men, 65-74**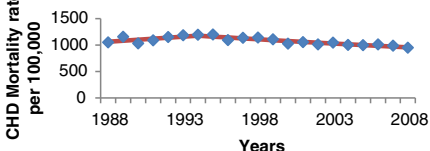**Women, 65-74**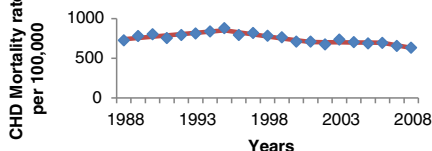**Men, 75+**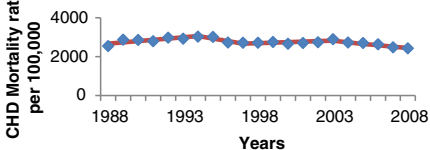**Women, 75+**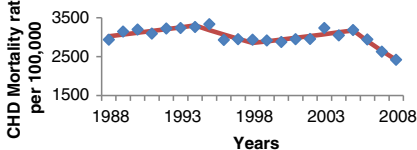

—●— Observed

—●— Modelled

Supplement: MOESM3 [file 9496374]
